# Supplementary material for: International patterns of dual antiplatelet therapy duration after acute coronary syndromes
Source: PubMed Central journal article supplement — Heart. 2016 Aug 8;103(2):132–8. doi: 10.1136/heartjnl-2016-309509 (PMC5284475; doi:10.1136/heartjnl-2016-309509), 2016-08-08
Supplement: heartjnl-2016-309509supp.pdf [file heartjnl-2016-309509supp.pdf]

# Dual antiplatelet therapy duration after acute coronary syndromes: the international EPICOR registry

*Héctor Bueno, Stuart Pocock, Nicolas Danchin, Lieven Annemans, John Gregson, Jesús Medina, Frans Van de Werf*

## Supplementary Information

### Table of Contents

|                                                                                                                                                                                                               |   |
|---------------------------------------------------------------------------------------------------------------------------------------------------------------------------------------------------------------|---|
| Supplementary table. Number of coronary events before and after changes in medication in patients discharged on DAPT                                                                                          | 2 |
| Supplementary figure Cumulative percentage of (A) CV events, (B) All-cause death, (C) Coronary events, (D) Myocardial infarction and (E) Clinically relevant bleeds during follow-up after hospital discharge | 3 |
| List of participant countries (by region) and investigators                                                                                                                                                   | 4 |

**Supplementary table. Number of coronary events before and after changes in medication in patients discharged on DAPT**

| Period of follow-up                         | Coronary events or CV death (n=609) |                              |                             |                                         | All CV events (n=769)    |                              |                             |                                         |
|---------------------------------------------|-------------------------------------|------------------------------|-----------------------------|-----------------------------------------|--------------------------|------------------------------|-----------------------------|-----------------------------------------|
|                                             | No. of eligible patients            | No. of changes in medication | No. of events, (% of total) | Event rate per 100 person-years at risk | No. of eligible patients | No. of changes in medication | No. of events, (% of total) | Event rate per 100 person-years at risk |
| During time on DAPT                         | 8593                                | –                            | 517 (84.9)                  | 4.6                                     | 8593                     | –                            | 655 (85.2)                  | 5.9                                     |
| After changing medication (during any time) | 3608                                | 4041                         | 92 (15.1)                   | 2.7                                     | 3551                     | 3976                         | 114 (14.8)                  | 3.4                                     |
| <7 days after change                        | 3608                                | 4041                         | 3 (0.5)                     | 3.9                                     | 3551                     | 3976                         | 7 (0.9)                     | 9.2                                     |
| 7–30 days after change                      | 3580                                | 4004                         | 6 (1.0)                     | 2.4                                     | 3520                     | 3936                         | 9 (1.2)                     | 3.7                                     |
| >30 days after change                       | 3467                                | 3865                         | 83 (13.6)                   | 2.7                                     | 3406                     | 3796                         | 98 (12.7)                   | 3.2                                     |

CV, cardiovascular; DAPT, dual anti-platelet therapy.

**Supplementary figure. Cumulative percentage of (A) CV events, (B) All-cause death, (C) Coronary events, (D) Myocardial infarction and (E) Clinically relevant bleeds during follow-up after hospital discharge**

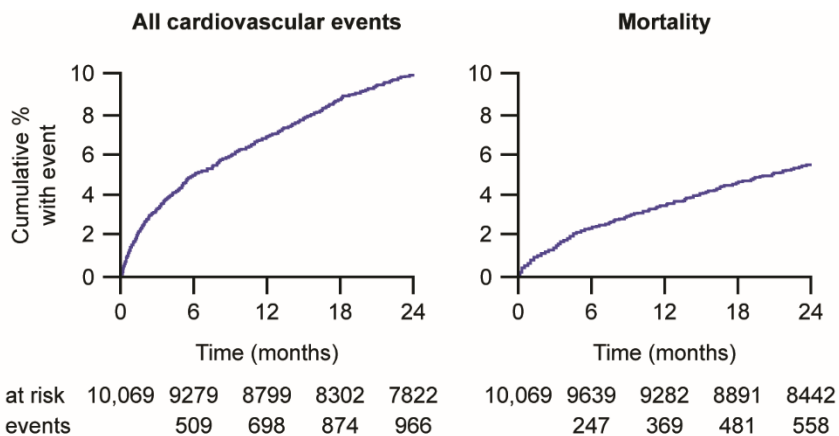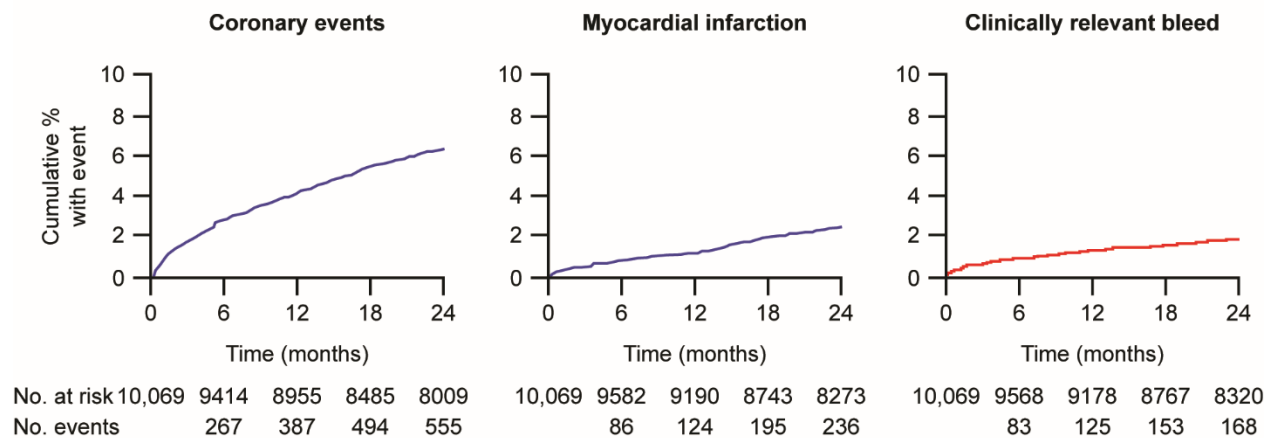

CV, cardiovascular.

## List of participant countries (by region) and investigators

### NORTHERN EUROPE

**Belgium:** Cristophe Beauloye (Cliniques St-Luc, Université Catholique de Louvain), Peter Sinnaeve (University Hospitals Leuven), Luc De Wolf (H Hart Tienen), Hendrik Celen (H. Hartziekenhuis Leuven), Mathias Vrolix (Ziekenhuis Oost-Limburg – Genk), Bert Vanhauwaert (Mariaziekenhuis), Luc Missault (AZ Sint-Jan), Marc Detollenaere (AZ Sint-Augustinus), Jan Vanwelden (ZNA Jan Palfijn), Marc Claeys (UZ Antwerpen), Toon Wildiers (Helig Hart Zkh Lier), Harry Striekwold (H Hart – Mol), Emanuele Barbato, Onze-Lieve-Vrouw Ziekenhuis – Campus Aalst), Antoine de Meester (Hôpital de Jolimont), Philippe Brunner (Ambroise Paré), Jacques Lalmond (CHU Charleroi), Alexianne Mandieau (CHU Vésale), Marc Renard (ULB – Hôpital Erasme), Samir Khouzam (CHR Haute Senne – Site Tilleriau), Christian Berthe (CHU Notre Dame Les Bruyères), Wim Hutse (AZ Alma – Campus Eeklo), Frank Van Den Branden (ZNA Middelheim), Joeri Voet (St Nikolaas – Campus Moerland), John Thoeng (Sint-Elisabethziekenhuis), Frank Cools (AZ Klina), Luc Van Driessche (AZ Sint Blasius), Frederik Van Durme (Zusters van Barmhartigheid), Francis Stammen (Heilig HartZiekenhuis Roeselare), Marc Bougard (CHWAPI), Angel Lozano (Clinique Ste Anne St Rémi), Bruno Pirenne (Clinique Saint-Pierre), Danny Schoors (AZ VUB), Dhooghe Glenn (AZ Damiaan), Thierry Josse (Hôpitaux Iris Sud), Eric Mievis (CHR Namur), Pierre-Emmanuel Massart (Clinique Ste-Elisabeth)

**Denmark:** Lars Frost (Silkeborg), Ole May (Herning), John Markenvard (Fredericia), Knud Erik Pedersen (Odense), Jan Skov Jensen (Gentofte), Peer Grande (Rigshospitalet), Christian Tuxen (Frederiksberg), Henrik Nielsen (Bispebjerg), Lars Hvilsted Rasmussen (Aalborg), Steen Husted (Aarhus), Elsebeth Vibeke Friis (Esbjerg), Jens Petersen (Hjørring), Søren Lind Rasmussen (Hvidovre), Flemming Davidsen (Haderslev), Ricardo Sanchez (HjerteCenter Varde), Steen Dalby Kristensen (Skejby), Hans Rickers (Randers), Henning Hoby Andersen (Farsø)

**Finland:** Ilkka Tierala (HUS, Meilahden Sairaala, Helsinki), Juhani Airaksinen (Turun Yliopistollinen Keskussairaala, Turku), Tuomas Kerola (Päijät-Hämeen Keskussairaala, Lahti), Saira Vikman (TAYS, Sydänkeskus, Tampere), Jarkko Niva (Keski-Suomen Keskussairaala, Jyväskylä), Juha Hartikainen (Kuopion Yliopistollinen Sairaala, Kuopio), Rene Hasselblatt (Seinäjoen Keskussairaala, Seinäjoki), Alexandre Hadjikov (Lapin Keskussairaala, Rovaniemi), Hannu Näveri (Jorvin Sairaala, Espoo)

**Germany:** Peter L Schwimbeck (Klinikum Leverkusen, Leverkusen), Sabine Genth-Zotz (Klinikum der Universität Mainz), Achim Rotter (Privatklinik Dr Robert Schindlbeck GmbH & Co KG, Herrsching am Ammersee), Matthias Meier (St Marien-Hospital GmbH, Borken), Tim Schäufele (Robert-Bosch Krankenhaus, Stuttgart), Dietrich Andresen (Vivantes-Klinikum am Urban, Berlin), Werner

Haberbosch (Zentralklinikum Suhl), Alexander Krapivsky (Evangelisches Krankenhaus Mülheim), Hubertus Heuer (St-Johannes Hospital, Dortmund), Christoph Stellbrink (Städtische Kliniken Bielefeld), Thomas Dorsel (Josephs-Hospital, Warendorf), Alexander Joost (Universitätsklinikum Schleswig-Holstein, Lübeck), Ulrich Tebbe (Klinikum Lippe-Detmold GmbH, Detmold), Stephan Lüders (St-Josefs- Hospital, Cloppenburg), Aydan Ewers (Berufsgenossenschaftliche Kliniken Bergmannsheil, Klinikum de Ruhr-Universität Bochum), Matthias Leschke (Städtische Kliniken Esslingen), Evangelos Giannitsis (UniversitätsKlinikum Heidelberg), Johannes Brachmann (Klinikum Coburg, Coburg), Uwe Zeymer (Klinikum Stadt Ludwigshafen, Ludwigshafen), Jürgen vom Dahl (Kliniken Maria Hilf GmbH, Mönchengladbach), Georg Nickenig (Universitätsklinik Bonn), Christian Hengstenberg (Universitätsklinikum, Regensburg), Stephan Holmer (Klinikum Landshut GmbH), Dieter Fischer (Universitätsklinikum Münster, Münster), Roland Prondzinsky (Carl-von-Basedow-Klinikum Merseburg), Christoph Nienaber (Universitätsklinik Rostock), Christoph Naber (Elisabeth-Krankenhaus Essen), Stephan Felix (Ernst-Moritz-Arndt-Universität Greifswald), Andreas Perniok (Elisabeth-Klinik, Olsberg)

**Luxembourg:** Daniel Wagner (Centre Hospitalier du Luxembourg)

**Netherlands:** Marcel Bokern (Waterland Ziekenhuis, Purmerend), Arnoud van 't Hof (Isala Klinieken, Zwolle), Wik ten Holt (Ziekenhuis Amstelland), Leen van Wijk (Refaja Ziekenhuis, Stadskanaal), Chris van der Lee (Streekziekenhuis Koningin Beatrix [SKB] Winterswijk), An de Clercq (Lievensberg Ziekenhuis), Jeroen van Eck (Jeroen Bosch Ziekenhuis, Groot Ziekengasthuis), Joost Frederiks (Ziekenhuis Bronovo, Den Haag), Anho Liem (Admiraal de Ruyter Ziekenhuis, Goes), Jon Funke Kupper (Kennemer Gasthuis, Haarlem), Timo Lenderink (Atrium Medisch Heerlen), Aaf Kuijper (Spaarne Ziekenhuis, Hoofddorp), Hong Kie The (Ziekenhuis Bethesda Hoogeveen), Pieter Hoogslag (Diaconessenhuis, Meppel), Iris Westendorp (Rode Kruis Ziekenhuis, Beverwijk), Eelko Ronner (Reinier de Graaf Ziekenhuis, Delft), John van Hal (Slingeland Ziekenhuis, Doetinchem), Machiel van de Wetering (BovenIJ Ziekenhuis, Amsterdam)

**Norway:** Sigrun Halvorsen (Oslo Universitetssykehus Ullevål), Ellinor Aaser (Vestre Viken HF, Sykehuset Asker og Baerum, Rud), Pål Smith (Akershus Universitetssykehus HF, Lørenskog), Jon Arne Sparby (Sykehuset Innlandet HF, Kongsvinger), Kjell Andersen (Sykehuset Innlandet HF, Hamar), Anders Meyer (Sykehuset Innlandet HF, Elverum), Ulf Hurtig (Sykehuset Innlandet HF, Tynset), Geir Høgalmen (Sykehuset Innlandet HF, Lillehammer), Olve Skjetne (Sykehuset Innlandet HF, Gjøvik), Ottar Aase (Vestre Viken HF, Ringerike Sykehus, Hønefoss), Oddvar Øygarden (Sykehuset Telemark, Rjukan), Jan Hysing (Sykehuset Telemark, Skien), Dennis Nilsen (Stavanger Universitetssjukehus, Stavanger), Tor Omland (Sørlandet Sykehus HF, Flekkefjord), Rune Fanebust (Haukeland Universitetssykehus, Bergen), Kjell Waage (Helse Fonna HF Haugesund Sjukehus, Haugesund), Arild Dimmen (Kristiansund Sjukehus), Eva Søgner (Helse Førde HF

Sentralsjukehuset, Førde), Rune Wiseth (St Olvas Hosital HF, Trondheim), Torbjørn Graven (Sykehuset Levanger), Knut Tore Lapppegård (Nordlandssykehuset HF, Bodø), Geir Heggelund (Universitetssykehuset Nord-Norge HF Tromsø), Siri alm (Universitetssykehuset Nord-Norge HF Harstad), Øystein Moe (Helse Finnmark HF Hammerfest Sykehus), Erik Harald Øie (Diakonhjemmet Sykehus AS, Oslo), Arne Lied, Helse Nordmøre og Romsdal, Molde Sjukehus), Jan Erik Otterstad (Sykehuset i Vestfold, Tønsberg)

**United Kingdom:** Robert F Storey (Northern General Hospital, Sheffield), Rangasamy Muthusamy (Rotherham District General Hospital), Mark Ramsey (Morrison Hospital, Swansea), Azfar Zaman (Freeman Hospital, Newcastle upon Tyne), Mark de Belder (James Cook University Hospital, Middlesbrough), Jason Glover (North Hampshire Hospital, Basingstoke), Ashok Jacob (St John's Hospital, Livingston), Alastair CH Pell (Monklands Hospital, Airdrie), Mark Francis (Victoria Hospital, Kirkcaldy), Piers Clifford (Wycombe General Hospital, High Wycombe), Colin Berry (Western Infirmary, Glasgow), Brian O'Rourke (Hairmyres Hospital, East Kilbride), Honer Kadr (Queens Hospital, Romford), Dai Rowlands (Peterborough District Hospital), Enefiok Ekpo (Queen Elizabeth Hospital, London), Andrew Moriarty (Craigavon Area Hospital), Sunil Nadar (Good Hope Hospital (Sutton Coldfield), Tom Troughton (Antrim Area Hospital), Kevin Beatt (Mayday Hospital, Croydon), Rajdeep Khattar (Manchester Royal Infirmary), Colm Hanratty (Belfast City & Royal Victoria Hospitals, Belfast), Gregory YH Lip (City Hospital, Birmingham), Ranjit More (Blackpool Victoria Hospital), Hugh McIntyre (Conquest Hospital, Hastings), Diana Gorog (Queen Elizabeth II Hosital, Welwyn Garden City and Lister Hospital, Stevenage), John MacDonald (Royal Blackburn Hospital), Adrian Brady (Glasgow Royal Infirmary), Jasper Trevelyan (Worcestershire Royal Hospital, Worcester), Shahram Ahmadvazir (Northwick Park Hospital, Harrow)

## **SOUTHERN EUROPE**

**France:** Jean Philippe Mouret (Hôpital Timone Adultes, Marseilles), Anthony Foucault (Hôpital Côte de Nacre, Caen), Laure Champ Rigot (Hôpital Côte de Nacre, Caen), Vincent Roule (Hôpital Côte de Nacre, Caen), Philippe Castellant (Hôpital de la Cavale Blanche, Brest), Jonathan Banayan (CHU Trousseau, Chambray les Tours), Charles Christophe (Hôpitaux de Brabois, Vandoeuvre-lès-Nancy), Frédéric Moulin (Hôpitaux de Brabois, Vandoeuvre-lès-Nancy), Soraya El Ghannudi (Hôpital Civil, Strasbourg), Anne Koenig (Hôpital Civil, Strasbourg), Saida Cheggour El Bouazzaoui (CH Henri Duffaut, Avignon), Jean-Guillaume Dillinger (GH Lariboisière Fernand Widal, Paris), Johanne Silvain (GH Pitié-Salpêtrière, Paris), David Bertora (Hôpital Pasteur, Nice), Pamela Mocerri (Hôpital Pasteur, Nice), Benoît Bayle (CH Louis Pasteur, Le Coudray), Teodora Dutoiu (CH Louis Pasteur, Le Coudray), Olivier Bizeau (Hôpital La Source, La Source), Mohamed Terbah (Hôpital La Source), François Lesaffre (Hôpital Robert Debré, Reims), Olivier Tricot (CH de Dunkerque),

Steve Werquin (CH de Dunkerque, Dunkerque), Alexandre Avran (Clinique Générale, Marignane), Yann Valy (CH Saint Louis, La Rochelle), Sébastien Bosle (CH de Brive la Gaillarde), Jean-Yves Wiedemann (Hôpital Emile Muller, Mulhouse), Frédéric Targosz (Hôpital Saint Jean, Perpignan), Said Ahres (Hôpital Louis Pasteur, Colmar), Stéphane Greciano (Hôpital Louis Pasteur, Colmar), Ahmad Ibrahim (Hôpital Louis Pasteur, Colmar), Anastassia Alexeeva-Kovalchuk (CH de Lagny sur Marne), Nicolas Baron (CH André Mignot, Le Chesnay), Jean-Louis Georges (CH André Mignot, Le Chesnay), Gregory Schoukroun (Hôpital Privé d'Antony), Nacéra Abbou (Hôpital Ambroise Paré, Boulogne Billancourt), Nicolas Mansencal (Hôpital Ambroise Paré, Boulogne Billancourt), Nicolas Amabile (Centre Chirurgical Marie Lannelongue, Le Plessis Robinson), Xavier Troussier (Centre Chirurgical Marie Lannelongue, Le Plessis Robinson), Anthony Scemama (Hôpital Foch, Suresnes), Laurent Payot (CH André Grégoire, Montreuil), Mohand Goudjil (CH Victor Dupouy, Argenteuil), Hélène Aelion (GH Cochin St Vincent de Paul, Paris), Adi Issa (Hôpital Jacques Coeur, Bourges), Christophe Bretelle (CH de Valence), Philippe Chapon (CH de Valence), Thierry Joseph (CH de Cornouaille, Quimper), Dominique Valla (Hôpital de Bon Secours, Metz), Anne Rischner (CH de Haguenau), Dana Aluas (CH de Chambéry), Franck Barbou (Hôpital d'Instruction des Armées du Val de Grace, Paris), Michel Mansour (CH de Belfort), Walid Amara (GHI le Raincy Montfermeil), Benjamin Safar (GHI le Raincy Montfermeil), Yves Cottin (CHU Dijon – Hôpital du Bocage)

**Greece:** George Andrikopoulos (Errikos Dynan Hospital, Athens), Anastasia Kitsiou (Sismanoglio General Hospital, Athens), Vlasios Pirgakis (General Hospital of Athens G Gennimatas), Maria Anastasiou Nana (Attikon University General Hospital, Athens), Evangelos Papasteriadis (General Hospital of Nikaia, Athens), Christoforos Olympios (General Hospital of Elefsina), Athanasios Kranidis (General Hospital of West Attika), Manolis Athanasios (General Hospital of Voula "Asklipio", Athens), Panagiotis Vardas (University General Hospital of Heraklion), Kostas Oikonomou (General Hospital of Edessa), Ioannis Goudevenos (University General Hospital of Ioannina), Tryposkiadis Filippou (University General Hospital of Larisa), Dimitrios Alexopoulos (University General Hospital of Patras), Ioannis Mantas (General Hospital of Chalkida), Athanasios Pras (General Hospital of Chania), Athanasios Kartalis (General Hospital of Chios), Stylianos Lambropoulos (General Hospital of Ptolemaida "Bodosakio", Ptolemaida), Vasilios Voudris (Onassis Cardiac Surgery Center, Athens), Athanasios Pipilis (Hygeia Hospital, Athens)

**Italy:** Claudio Cavallini (Ospedale Santa Maria della Misericordia, Perugia), Gian Battista Danzi (Ospedale Maggiore Policlinico di Milano), Zoran Olivari (Presidio Ospedaliero ca' Foncello-Treviso), Giancarlo Casolo (Ospedale Unico della Versilia), Giovanni Percoco (Ospedale del Delta-Lagosanto, Ferrara), Giancarlo Marenzi (Centro Cardiologico Monzino Milano), Giancarlo Piovaccari (Cardiologia – Ospedale degli Infermi Rimini), Elena Zappia (Ospedale Pediatrico Apuano G Pasquinucci, Massa-Carrara), Pierfranco Terrosu (ASL Sassari Ospedale Civile SS Annunziata),

Paolo Calabrò (Ospedale Monaldi, Napoli), Ciro Indolfi (Policlinico Universitario Mater Domini, Catanzaro), Ernesto Mossuti (Azienda Ospedaliera Umberto I di Siracusa), Germano Di Sciascio (Università Campus Biomedico, Roma), Paolo Golino (Azienda Ospedaliera Sant'Anna e San Sebastiano – Seconda Università di Napoli, Caserta), Roberto Violini (San Camillo Forlanini, Roma), Giovanni Maria Santoro (Ospedale San Giovanni di Dio, Firenze), Leonardo Paloscia (Ospedale Civile Santo Spirito di Pescara), Ciro Mauro (Ospedale Cardarelli, Napoli), Gianluigi Morgagni (Ospedale di Macerata), Gian Piero Perna (Ospedale Lancisi, Ancona), Marco Valgimigli (Arcispedale Sant'Anna, Ferrara), Francesco Gentile (Ospedale Bassini Cinisello, Milano), David Antonucci (Azienda Ospedalier Universitario Careggi di Firenze), Pasquale Perrone Filardi (Università degli Studi di Napoli Federico II), Loris Roncon (Ospedale Maria della Misericordia ULSS 18 di Rovigo – SOC Cardiologia), Paolo Rubartelli (ASL 3 Ospedale Villa Scassi, Genova), Antonio Fiscella (Ospedale Cannizzaro di Catania), Leonardo De Luca (European Hospital, Roma), Gavino Casu (Ospedale San Francesco di Nuoro), Luca Testa (Istituto Clinico Sant'Ambrogio, Milano), Massimo Santino (Ospedale San Filippo Neri, Roma), Alberto Limido (Ospedale di Circolo e Fondazione Macchi di Varese), Francesco Pestelli (Ospedale Misericordia e Dolce di Prato), Ercole Rovelli (Ospedale di Rho)

**Spain:** Carlos Gonzalez Juanatey (Hospital Xeral Calde), Enrique Iglesias Rio (Hospital Arquitecto Marcide), Pilar Mazon Ramos (Hospital Clinico Universitario de Santiago Compostela), Jaime Nevado Portero (Hospital Universitario Virgen del Rocío), Javier Zafra Sánchez (Hospital Comarcal de la Axarquía, Málaga), Carmen Navarro Lostal (Hospital Valle de los Pedroches, Pozoblanco), Justo Guevara Zuazo (Hospital Infanta Elena, Huelva), Eduardo Sebastián López Sánchez (Hospital Comarcal la Inmaculada, Almería), Miguel Muñoz Robles (Hospital de Baza), Juan Beltran Rodriguez (Hospital Nuestra Señora de Valme, Sevilla), Román Calvo Jambrina (Hospital Virgen Macarena, Sevilla), Rodolfo-Eduardo Reinoso (Hospital de Barbastro), Juan Pablo Gomollon Garcia (Hospital Lozano Blesa, Zaragoza), Gregorio Moyano Benito (Hospital Miguel Servet), Beatriz Ordoñez Rubio (Hospital Royo Villanova), Rafael Raso Raso (Hospital Virgen de la Salud de Elda), Miguel Quintana Rendón (Hospital de Torre Vieja), Placido Orosa Fernandez (Hospital Frances Borja de Gandia), Fernando Garcia de Burgos (Hospital General Elche), Vicente Arrate Estaban (Hospital General Universitario de Alicante), Adolfo Rincon de Arellano Castellvi (Hospital Universitario Doctor Peset Aleixandre, Valencia), Elvira Marco Francés (Hospital Virgen de los Lirios, Alcoy), Ramón López Palop (Hospital San Juan de Alicante), Antonio Salvador Sans (Hospital Universitario la Fe, Valencia), Ana María García de Castro (Complejo Hospitalario de Toledo), Luis Ruiz-Valdepeñas Herrero (Hospital General de Ciudad Real), Patricia Calderon Jimenez (Hospital Sana Barbara), Norberto Alonso (Complejo Asistencial de León), Pedro Pabon Osuna (Hospital Universitario Salamanca), Carlos Junquera Plana (Hospital General de Segovia), Jose Maria Asin Guillen (Hospital Rio Carrión), Juan Ramón Costa Vazquez (Hospital Nuestra Señora de Sonsoles, Ávila), Juan María



Escudero Villar (Hospital de Igualada), Xavier García Moll (Hospital de la Santa Creu i Sant Pau, Barcelona), Maria Dolores Martínez Ruiz (Hospital de Terrassa), Montserrat Barcons Vergés (Hospital General de Vic), Xavier Albert Bertán (Hospital General Universitario Dr Josep Trueta, Girona), Ramón de Castro (Hospital Universitari Joan XXII, Tarragona), Delicia Gentile Lorente (Hospital de Tortosa Virgen de la Cinta), Jose Antonio Barrabes Riu (Hospital Vall d'Hebron, Barcelona), Leopoldo Perez de Isla (Hospital Carlos III, Madrid), Antonio Fernández Ortiz (Hospital Clínico San Carlos, Madrid), Joaquin Alonso Martín (Hospital de Fuenlabrada, Madrid), Maurice Batlle Perez (Hospital del Henares, Madrid), Héctor Bueno Zamora (Hospital Universitario Gregorio Marañón, Madrid), Roberto Muñoz Aguilera (Hospital Infanta Leonor, Madrid), Ignacio Plaza (Hospital Infanta Sofía), Adriana Saltijeral Cerezo (Hospital del Tajo, Madrid), Juan María de Alba Montero (Hospital Universitario Principe de Asturias)

## **EASTERN EUROPE AND TURKEY**

**Poland:** Janina Stępińska (Instytut Kardiologii, Klinika Intensywnej Terapii Kardiologicznej, Warszawa), Andrzej Hoffmann (SPZOZ w Bydgoszczy, Oddział Kardiologii i Rehabilitacji Kardiologicznej), Malgorzata Smreczynska (Specjalistyczny Szpital im dr Alfreda Sokolowskiego Walbrzyski Ośrodek Kardiologii inwazyjnej, Oddział Kardiologiczny), Ryszard Sciborski (ZOZ Olawa Oddział Chorob Wewnętrznych), Anna Sajkowska (Szpital Kliniczny im Heliodora Świącickiego Uniwersytetu Medycznego im Karola Marcinkowskiego w Poznaniu Katedra i Klinika Intensywnej Terapii Kardiologicznej i Chorób Wewnętrznych), Mateusz Sobota (SP ZOZ Sandomierz), Jerzy Kopaczewski (Szpital Wojewódzki we Włocławku Oddział Kardiologii z Ośrodkiem Wszczepiania Stymulatorów), Maria Mickiewicz-Pawlowska (Wojewódzki Szpital Zespolony w Elblagu, Oddział Kardiologii z Intensywnym Nadzorem Kardiologicznym), Sławomir Jasek (Instytut Kardiologii im Prymasa Tysiąclecia Stefana Kardynała Wyszyńskiego, II Klinika Choroby Wieńcowej), Krystyna Jaworska (Wojewódzki Szpital Zespolony w Toruniu Oddział Kardiologii i Intensywnej Opieki Kardiologicznej), Jacek Gessek (Specjalistyczny Szpital Miejski w Toruniu Oddział Kardiologii i Intensywnej Opieki Kardiologicznej), Jacek Warso (Radomski Szpital Specjalistyczny im Tytusa Chałubińskiego, Oddział Kardiologiczny), Bogusław Derlaga (Specjalistyczny Szpital w Tarnowie im E Szczeklika, Oddział Kardiologii Inwazyjnej), Wojciech Krzyzanowski (Szpital Powiatowy im Marii Skłodowskiej-Curie w Ostrowi Maz Oddział Kardiologiczny), Joanna Szachniewicz (4 Wojskowy Szpital Kliniczny z Polikliniką, Klinika Kardiologii, SPZOZ Ośrodek Chorób Serca), Blazej Kozłowski (Międzyzyleski Szpital Specjalistyczny w Warszawie, Oddział Kardiologii i Chorób Wewnętrznych), Zbigniew Kiedrowiz (Wojewódzki Szpital Specjalistyczny im Janusza Korczaka, Oddział Kardiologii), Elżbieta Zinka (Szpital Wojewódzki im M Kopernika w Koszalinie), Jarosław Nowak (Szpital Bielański im ks Jerzego Popiełuszki SPZOZ, Kliniczny Oddział Kardiologiczny), Monika Durak (Krakowski Szpital Specjalistyczny

im Jana Pawła II, Centrum Interwencyjnego Leczenia Chorób Serca i Naczyń z Pododdziałem Kardiologii Interwencyjnej), Jarosław Bugajski (PS ZOZ Wojewódzkie Centrum Medyczne w Opolu Oddział Kardiologiczny), Jacek Frątczak (Wojewódzki Szpital Zespolony im L Perzyny w Kaliszu Oddział Kardiologiczny), Jakub Kuna (Miejski Szpital Zespolony w Olsztynie Oddział Kardiologiczno-Internistyczny), Grzegorz Szastak (NZOZ Prowadzony Przez GVM Carint sp z.o.o., Centrum Kardiologii Inwazyjnej Elektroterapii i Angiologii NZOZ w Oświęcimiu), Magdalena Tulinska (Kociewskie Centrum Zdrowia Sp z.o.o. NZOZ Szpital Św Jana, Oddział Kardiologiczny)

**Romania:** Dragos Vinereanu (Spitalul Universitar de Urgenta Bucuresti), Mircea Rau (Spitalul Judetean de Urgenta Alba Iulia), Dan Darabantiu (Spital Clinic Judetean Urgenta Arad), Laura Iosipescu (Spital Judetean Urgenta Bacau), Calin Pop (Spitalul Judetean de Urgenta C-tin Opris Baia Mare), Mihai Haragus (Spital Judetean Bistrita), Bogdan Minescu (Spital Judetean Urgenta Braila), Elena Bobescu (Spital Judetean Urgenta Brasov), Ileana Tepes Piser (Institutul de Boli Cardiovasculare Prof CC Iliescu), Crina-Julieta Sinescu (Spitalul Clinic de Urgenta Prof Dr Bagdasar-Arseni), Maria Dorobantu (Spital Clinic Urgenta Floreasca Bucuresti), Liliana Protopopescu (Spitalul Sf Pantelimon Bucuresti), Simona Huidu (Spital Universitar Urgenta Elias Bucuresti), Mircea Constantinescu (Spitalul Judetean Buzau), Radu Capalneau (Institutul Inimii Cluj-Napoca), Dumitru Zdrenghea (Spitalul Clinic de Recuperare Cluj-Napoca), Elvira Craiu (Spitalul Clinic Judetean Urgenta Constanta – Clinic 1), Marius Toringhibel (Spital Clinic Judetean Urgenta Constanta), Rodica Musetescu (Centrul Clinic de Cardiologie Craiova), Nicolae Trocan (Spital Judetean Drobeta-Turnu Severin), Cristina Bengus (Spital Judetean Urgenta Sf Pantelimon Focsani), Daniela Dragusin (Sitalul Clinic Judetean de Urgenta Sf Apostol Andrei Galati), Irina Radu (Spital Municipal Urgenta Hunedoara), Catalina Arsenescu-Georgescu (Institut Boli Cardiovaculare G Georgescu), Irina Costache (Spital Clinic Judetean Urenta Sf Spiridon), Virgil Popa (Spital Clinic Judetean Urgenta Oradea), Carmen Martin (Spitalul Jedetean de Urgenta Piatra Neamt), Gabriela Stanciulescu (Spital Judetean Urgenta Pitesti), Dumitru Predescu (Spital Judetean Urgenta Buna Vestire Ploiesti), Ilie Petrescu (Spitalul Judetean de Urgenta Valcea), Ioan Manutiu (Spitalul Clinic Judetean de Urgenta Sibiu), George Boeru (Spital Judetean Slatina), Mihai Creteanu (Spitalul Judetean Sf Ioan cel Nouo Suceava), Mircea Vladioianu (Spitalul Judetean de Urgenta Targoviste), Mihail Dinesch (Institutul de Boli Cardiovasculare si Transplant Tg Mures), Benedek Imre (Sitalul Clinic Judetean de Urgenta Tg Mures), Lucian Petrescu (Institut Boli Cardiovasculare Timisoara), Doina Rosu (Spital Clinic Judetean Urgenta Timisoara), Mirela Tomescu (Spital Clinic Municipal Urgenta Timisoara), Bodan Minodora (Spitalul Judetean de Urgenta Zalau), Ioan Manitiu (Spitalul Clinic Judetean de Urgenta Sibiu),

**Slovenia:** Igor Kranjec (University Medical Centre Ljubljana), Vojko Kanic (University Medical Centre Maribor)

**Turkey:** Fatih Sinan Ertaş (Ankara University Medical Faculty İbn-I Sina Hospital), Ekrem Yeter (Ankara Dışkapı Yıldırım Beyazıt T&R Hospital), Mustafa Cemri (Gazi University Medical Faculty), Kamil Adalet (İstanbul University Medical Faculty), Murat Ersanlı (İstanbul University Institute of Cardiology), Zeki Ongen (İstanbul University Cerrahpaşa Medical Faculty), Osman Bolca (Prof Dr Siyami Ersek Heart & Chest Surgery T&R Hospital), Neşe Çam (Prof Dr Siyami Ersek Heart & Chest Surgery T&R Hospital), Refik Emre Altekin (Akdeniz University Medical Faculty), Serdar Payzın (Ege University Medical Faculty), Sema Güneri (9 Eylül University Medical Faculty, Konak), Mura Yeşil (İzmir Atatürk T&R Hospital Clinic 1), Emin Alioğlu (İzmir Central Hospital), Ertuğrul Ercan (18 Mart University Medical Faculty, Çanakkale), Ceyhun Ceyhan (Adnan Menderes University Medical Faculty), Murat Çaylı (Adana Numune T&R Practicing Center), Ahmet Çamsarı (Mersin University Medical Faculty), Rojhat Altındağ (Diyarbakır T&R Hospital), Hasan Pekdemir (İnönü University Medical Faculty), Enbiya Aksakal (Atatürk University Aziziye Research Hospital), Mehmet Aksoy (Gaziantep University Medical Faculty), Merih Kutlu (Karadeniz Technical University Medical Faculty Farabi Hospital), Mehmet Yazıcı (Selçuk University Medical Faculty), Necmi Ata (Osmangazi University Medical Faculty), Abdurrahman Oğuzhan (Erciyes University Medical Faculty), Mahmut Şahin (19 Mayıs University Medical Faculty), Mesut Demir (Cukurova University Medical Faculty), Ilgın Karaca (Fırat University Medical Faculty), Mehmet Zihni Bilik (Diyarbakır T&R Hospital), Ali Timuçin Altın (Ankara University Medical Faculty), İzzet Tandoğan (Cumhuriyet University Medical Faculty), Alpay Turan Sezgin (Adana Başkent University TRC), Mehmet Sıddık Ulgen (Dicle University Medical Faculty), Gönül Zeren (Aksaray State Hospital)

## **LATIN AMERICA**

**Argentina:** Olscar Salome (Hospital Privado de Córdoba), Juan Fuselli (CEMIC), Sergio Varini (Centro Gallego), Ricardo Martellotto (Hospital Italiano de Córdoba), Hector Luciardi (Hospital centro de Salud), Ernesto Duroto (Fundación Favaloro), Lilia Lobo Marquez (Instituto de Cardiología), Gerardo Zapata (ICR), Raquel Saa Zarandon (Hospital Central de Mendoza), Eduardo Falu (Sanatorio del Carmen), Federico Achilli (Hospital Italiano), Gustavo Bustamante Labarta (Instituto de Cardiología, Sanatorio Nuestra Señora del Rosario), Marelo Trivi (Instituto Cardiovascular de Buenos Aires), Patricia Soria (Hospital Gral. de agudos), Roberto Bernadini (Sanatorio Juan XXII), Marcelo Dellatorre (Clínica Colombo), Alejandro Garcia Escudero (Sanatorio Nuestra Señora del Pilar), Stella Macin (Instituto de Cardiología), Pablo Stutzbach (Sanatorio Las Lomas), Gustavo Cardonatti (Hospital de San Isidro), Carlos Rapallo (Sanatorio Itoiz), Cristian Patocchi (Hospital Español de Bahía Blanca), Adrian Hrabar (Sanatorio Modelo Quilmes), Raul Badra (Hospital Privado de Comunidad), Simón Salzberg (Hospital Juan Fernández), Ricardo Foyé (Sanatorio San Lucas), Marcelo Gustavo Marino (Hospital de Emergencias), Carlos

Rivas (Hospital Alemán), Javier Sanchez (Instituto Cenesa), Diego Stisman (Hospital General Lamadrid)

**Brazil:** Gustavo Bernardes de Figueiredo Oliveira (Instituto Dante Pazzanese), Adrian Paulo Morales Kormann (Hospital Santa Isabel), Carisi Anne Polanczyk (Hospital de Clinicas de Porto Alegre), Célia Regina Echeverria Pinho da Silva (CPCLIN), Costantino Costantini (Hospital Cardiologico Costantini), Dalton Bertolim Prêcoma (Sociedade Hospitalar Angelina Caron), Delcio Gonçalves de Silva Junior (Hospital Universitário – UFMS), Denilson Campos Albuquerque (Hospital Copa D’or), Euler Roberto Fernandes Manenti (Hospital Mãe de Deus), Fernando Carvalho Neueschwander (Hospital Vera Cruz), Gilmar Valdir Greque (Instituto de Moléstias Cardiovasculares), Jamil Abdalla Saad (Hospital Felício Rocho), João Carlos Ferreira Braga (Instituto do Coração de Marília), José Armando Mangione (Real e Benemerita Associação Portuguesa de Beneficência), Paulo Ernesto Leães (Irmandade da Santa Casa de Misericórdia de Porto Alegre), Ricardo Wang (Irmandade da Santa Casa de Misericórdia de Curitiba), Roberto Vieira Botelho (Instituto do Coração do Triângulo Mineiro), Sérgio Luiz Zimmermann (Clinica Procardio Ltda), Yorghos Lage Michalaros (ATUAL – Instituto de Ensino, Consultoria e Pesquisa), Osana Maria Coelho Costa Mouco (Hospital de Base – FAMERP), Antônio Carlos Sobral Sousa (Hospital São Lucas), Wladimir Faustino Saporito (Hospital Estadual Mario Covas and Instituto de Moléstias Cardiovasculares de Tatui), Juliana Ascensão de Souza (Instituto de Cardiologia do Distrito Federal), Hélia Beatriz Nunes de Araujo (Hospital do Coração do Brasil), Mauro Esteves Hernandez (Santa Casa de Votuporanga), Antonio Luiz da Silva Brasileiro (Instituto Nacional de Cardiologia)

**Mexico:** Francisco Padilla Padilla (Hospital Bernardette Hidalgo, Guadalajara), Alberto Bazzoni Ruiz (Clínica de Diagnostico y Sanatorio Español, Torreón; Hospital Angeles Torreón, Torreón Coahuila; and Hospital General ISSSE Torreón), Alexandra Arias Mendoza (Instituto Nacional de Cardiología, Mexico City), Amada Alvarez San Gabriel (Instituto Nacional de Cardiología, Mexico City), Enrique Alfredo Bernal Ruiz (Unidad Medica de Alta Especialidad del IMSS, Leon Guanajuato), Enrique Díaz e Díaz (UMAE Hospital de Cardiología Centro Médico Nacional Siglo XXI, IMSS, Mexico City), Erick Alexanderson Rosas (Instituto Nacional de Cardiología, Mexico City), Francisco Cardosa Torres (UCC del ISSSTE, Durango), Guillermo Rivera Martínez (Hospital General de Tijuana, Tijuana baja California), Hernan de la Cruz Zurita (IMSS Hospital General de Zona 2, Tabasco; and Hospital General de Zona 46 del IMSS, Villahermosa Tabasco), José Adrian Medina Amarillas (Hospital Almater, Mexicali baja California), José de Jesús Alberto Romo Jara (UMAE Hospital de Especialidades Centro Medico Nacional de Occidente IMSS, Guadalajara Jalisco), Jesus Antonio Perez Rios (OSMO, Oaxaca), Juan Carlos Nuñez Fragoso (Hospital General de Durango), Juan Carlos Pérez Alva (Hospital General de Puebla “Dr Eduardo Vázquez Navarro”, Puebla), Julian Augusto Borges Moreno (Centro de Diagnostico Médico CEDIME, Merida Yucatan;

Hospital Ángeles de Torreón, Torreón Coahuila; and Unida Medica de Alta Especialidad, Merida Yucatan), Enrique Lopez Rosas (Hospital Angeles Xalapa, Xalapa Veracruz), Marco Antonio Alcocer Gamba (Hospital Medica TEC 100, Querétaro), Miguel Esteban Estrella Garza (Hospital Universitario Dr José Eleuterio Gonzalez, Monterrey NL), Octavio Beltran Nevares (Centro de Especialidades Medicas de Sinaloa CEMSI; Hospital General de Sinaloa; and Instituto de Seguridad Social al Servicio del Estado ISSSTE, Culiacán Sinaloa), Omar Fierro Fierro (Hospital General Regional No 1 IMSS, Chihuahua; and Hospital General ISSSTE Lázaro Cárdenas Del Rio, Chihuahua), Oscar Samuel Medina Torres (Unidad Médica de Alta Especialidad, Leon Guanajuato), Pericles Martinez Pérez (Centro Medico ISSEMYM, Toluca Estado de Mexico), Rodolfo Gaona Rodríguez (Centro para el Desarrollo de la Medicina y de Asistencia Medica Especializada SC, Saltillo Coahuila), José Rodolfo Ocampo Fernández (Hospital Angeles Roma; and Hospital General de Mexico SS, Mexico City), Ignacio Rodriguez Briones (Hospital Angeles Centro Medico del Potosi, San Luis Potosi), Alberto Bazzoni Ruiz (Hospital Angeles Torreon, Torreon Coahuila), Javier Antezana Castro (UMAE Hospital de Cardiología Centro Médico Nacional Siglo XXI, IMSS, Mexico City), Victoria Padilla Ríos (Mundo Fisico, Guadalajara Jalisco), Jose de Jesus Rivera Arellano (Centro de Atención e Investigación Cardiovascular del Potosi, SC, San Luis Potosi)

**Venezuela:** Norka Antepara (Hospital Universitario de Caracas UCV), Lempira Guevara (Hospital Vargas de Caracas), Sandra Perez (Centro Clinico La Urbina, Caracas), Maria Ines Marulanda (Centro Médico Guerra Méndez, Valencia), Alecia Nass (Clínica Razetti de Barquisimeto), Hector Marcano (Clínica El Ávila, Caracas), Rusvel Gomez (Hospital Dr Domingo Luciani, Caracas), Rafael Mesa (Hospital General del Sur, Maracaibo ), Cruz Arias (Centro Cardiovascular Oriental, Maturin ), Marlon Toro (Hospital Domingo Guzman Lander, Barcelona ), Kaduo Ari (ASCARDIO and Centro Clinico Valentina Canabal, Barquisimeto), Pedro Fernandez (Hospital Dr Raúl Leoni, Guayana), Guillermo Viloria (Centro Médico Docente La Trinidad, Caracas), Armando Bianco (Instituto Cardiovascular Guayana), Carlos Galan (Hospital Clinico Maracaibo), Jorge Paez (Hospital General Dr Miguel Perez Carreno, Caracas), Simon Tovar (Hospital Militar Dr Carlos Arvelo, Caracas), Roberto Correa (Centro Médico Caracas), Diego Reyes (Centro Médico Zambrano), Carlos Luis Delgado (Centro Policlinico Valencia La Viña, Valencia), Luis Davalos (Hospital Metropolitano del Norte, Valencia), Maria Laura Farina (Hospital Carabobo, Valencia), Jose Verde (Hospital Central, Valencia), Hector Gonzalez (Hospital Antonio Maria Pineda, Barquisimeto), Jose Ferrer (SM Diagnoscar, Caracas), Rito Abile (Hospital Metropolitano, Valencia), Rafael Ascanio (Centro Docente Cardiológico Bolivariano Aragua), Carlos Lopez (Hospital Militar de Maracay), Carlos Mogollon (Clínica Vista Alegre, Caracas), Alain Pasion (Centro Cardiovascular Regional del Estado Falcón [CECREFAL]), Oscar Sánchez (Instituto Médico La Floresta, Caracas), María Luisa Pellino (Centro Médico Loira, Caracas)
